# Supplementary material
Source: Springer Nature journal article supplement (https://www.springermedizin.de/resource/supplementary/12885_2012_4027_MOESM24_ESM.pdf/9465002)

Ex 750 / Em 565-615

Ex 860 / Em 650-710

**A**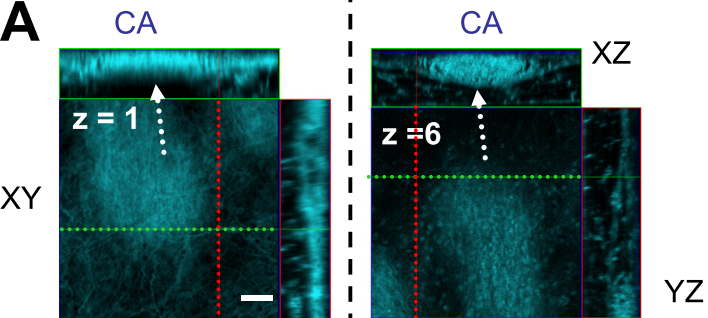**B**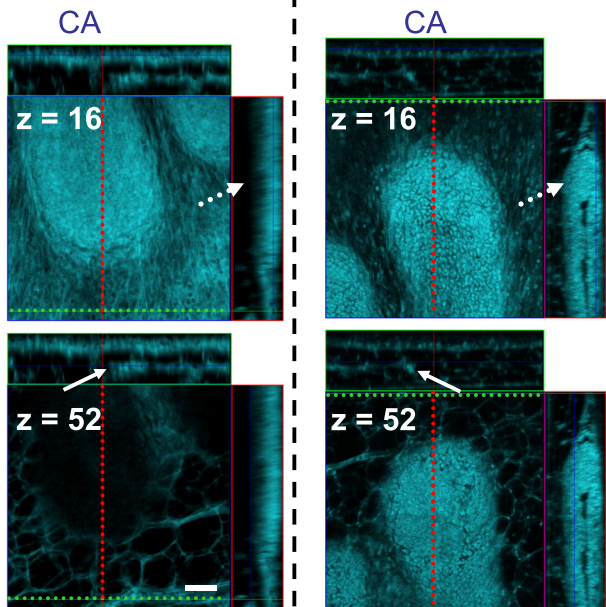**C**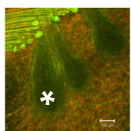

Rotate

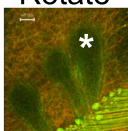

See 3D supplemental movies

Supplement: MOESM24 [file 9465002]
